# Supplementary material for: Thiourea-catalyzed aminolysis of N-acyl homoserine lactones
Source: Royal Society of Chemistry journal article supplement (doi:10.1039/c3cc00268c), 2013-01-01

## Supplementary Information

### **Thiourea-Catalyzed Aminolysis of N-Acyl Homoserine Lactones**

Michael A. Bertucci, Stephen J. Lee and Michel R. Gagné

*Department of Chemistry, University of North Carolina at Chapel Hill, Caudill Laboratories,  
Chapel Hill, NC, USA 27599-3290*

|                              |     |
|------------------------------|-----|
| Synthetic Procedures.....    | S2  |
| NMR Kinetic Experiments..... | S7  |
| Spectral Data.....           | S11 |

## Synthetic Procedures

### General

Commercial reagents were obtained from Sigma-Aldrich and Fisher Scientific. Column chromatography of all compounds, except catalyst **2f**, was completed using Fisher 230-400 Mesh Grade 60 silica gel. Catalyst **2f** was purified using a Waters semi-prep HPLC/UV-Vis with an XBridge 5 $\mu$ M C<sub>18</sub> column as detailed in the procedure below. NMR solvents were purchased from Cambridge Isotopes Laboratories. Product characterization and kinetics experiments were completed on either a 600 MHz or 500 MHz Bruker NMR spectrometer. All related coupling constants are reported in Hertz and shifts in ppm. Elemental analyses (C, H and N) were completed by Robertson Microlit Laboratories, Inc. High resolution mass spectrometry (HRMS) was completed by the Mass Spectrometry Laboratory at the School of Chemical Sciences, University of Illinois using ESI on a Waters Q-ToF Ultima mass spectrometer.

### Procedure for Thiourea Catalyst Synthesis (for **2a** – **2e**)

#### Scheme S1

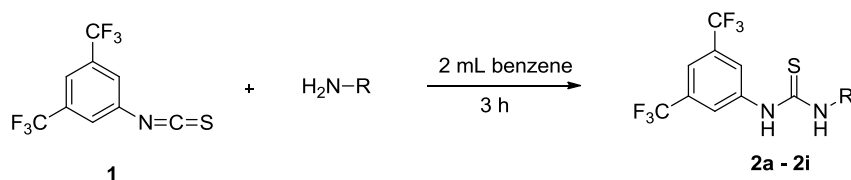

To a 25-mL schlenk flask flushed with  $\text{N}_2$ , **1** (0.336 mL, 1.84 mmol) was added and then solvated in benzene (1 mL). The corresponding amine (1.84 mmol) was added slowly to the flask. The walls of flask were washed with benzene (1 mL) and the reaction was allowed to stir at room temperature for 3 h. The reaction progress was monitored by TLC. The reaction mixture was concentrated under vacuum and redissolved in DCM. The product was purified by column chromatography with silica gel with a gradient mobile phase [DCM to MeOH/DCM (1:9)]. The percent yields reported in **Table 1** were obtained by combining pure fractions from the chromatographic separations, concentrating the combined fractions in a tared flask, and comparing the resultant mass relative to the theoretical product mass.

#### 1-(3,5-bis(trifluoromethyl)phenyl)-3-cyclohexylthiourea (**2a**)

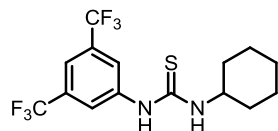

$\delta_{\text{H}}$  (DMSO- $\text{d}_6$ , 500 MHz) 9.88 (1H, s), 8.24 (2H, s), 8.18 (1H, s), 7.72 (1H, s), 4.12 (1H, br s), 1.92 (2H, m), 1.71 (2H, m), 1.58 (1H, m), 1.35 – 1.29 (5H, m);  $\delta_{\text{C}}$  (DMSO- $\text{d}_6$ , 125 MHz) 179.1,

141.9, 130.0 (q,  $J_{\text{CF}} = 33.9$  Hz), 123.2 (q,  $J_{\text{CF}} = 272.7$  Hz), 121.6, 115.7, 52.2, 31.5, 25.0, 24.3; HRMS (ESI) calcd for  $\text{C}_{15}\text{H}_{17}\text{N}_2\text{F}_6\text{S}$ : 371.1017, found: 371.1014 (M + H).

### 1-(3,5-bis(trifluoromethyl)phenyl)-3-propylthiourea (2b)

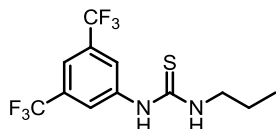

$\delta_{\text{H}}$  (DMSO- $d_6$ , 500 MHz) 10.00 (1H, s), 8.23 (3H, br s), 7.69 (1H, s), 7.72 (1H, s), 3.40 (2H, m), 1.56 (2H, dt,  $J = 7.5$  Hz), 0.89 (3H, t,  $J = 7.5$  Hz);  $\delta_{\text{C}}$  (DMSO- $d_6$ , 125 MHz) 180.2, 141.7, 129.8 (q,  $J_{\text{CF}} = 32.7$  Hz), 122.9 (q,  $J_{\text{CF}} = 272.9$  Hz), 121.4, 115.5, 45.3, 21.4, 11.0; HRMS (ESI) calcd for  $\text{C}_{12}\text{H}_{13}\text{N}_2\text{F}_6\text{S}$ : 331.0712, found: 331.0704 (M + H); Anal. Calc. for  $\text{C}_{12}\text{H}_{13}\text{N}_2\text{F}_6\text{S}$ : C, 43.64; H, 3.66; N, 8.48; found: C, 43.56, H, 3.66, N, 8.35.

### 1-(3,5-bis(trifluoromethyl)phenyl)-3-(2-(dimethylamino)ethyl)thiourea (2c)

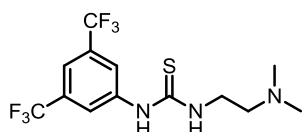

$\delta_{\text{H}}$  (DMSO- $d_6$ , 500 MHz) 10.27 (1H, s), 8.26 (2H, s), 8.10 (1H, s), 7.72 (1H, s), 3.56 (2H, br q), 2.44 (br t, 2H), 2.19 (6H, s);  $\delta_{\text{C}}$  (DMSO- $d_6$ , 150 MHz) 180.0, 141.9, 130.2 (q,  $J = 33.2$  Hz), 123.2 (q,  $J = 273.1$  Hz), 121.3, 115.8, 56.8, 44.9, 41.7; HRMS (ESI) calcd for  $\text{C}_{13}\text{H}_{16}\text{N}_3\text{F}_6\text{S}$ : 360.0696, found: 360.0962 (M + H).

### 1-(3,5-bis(trifluoromethyl)phenyl)-3-(3-(dimethylamino)propyl)thiourea (2d)

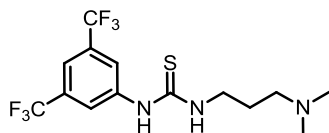

$\delta_{\text{H}}$  (DMSO- $d_6$ , 600 MHz)  $\delta$ 10.09 (1H, s), 8.33 (1H, s), 8.23 (2H, s), 7.70 (1H, s), 3.51 (2H, br s), 2.27 (2H, t,  $J = 6.60$  Hz), 2.12 (6H, s), 1.69 (2H, p,  $J = 6.60$  Hz);  $\delta_{\text{C}}$  (DMSO- $d_6$ , 150 MHz)  $\delta$ 180.3, 141.9, 130.2 (q,  $J_{\text{CF}} = 33.2$  Hz), 123.2 (q,  $J_{\text{CF}} = 273.1$  Hz), 121.8, 115.9, 56.8, 45.0, 42.6, 25.9; HRMS (ESI) calcd for  $\text{C}_{14}\text{H}_{18}\text{N}_3\text{F}_6\text{S}$ : 374.1126, found: 374.1126 (M + H).

### 1-(2-(1H-imidazol-4-yl)ethyl)-3-(3,5-bis(trifluoromethyl)phenyl)thiourea (2e)

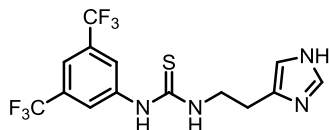

$\delta_{\text{H}}$  (DMSO- $d_6$ , 500 MHz) 11.90 (1H, br s), 10.21 (1H, s), 8.27 (3H, br s), 7.72 (1H, s), 7.57 (1H, s), 6.88 (1H, s), 3.76 (2H, br q), 2.81 (2H, t,  $J = 7.5$  Hz);  $\delta_{\text{C}}$  (DMSO- $d_6$ , 125 MHz) 180.2, 141.8, 134.4, 130.0 (q,  $J_{\text{CF}} = 32.7$  Hz), 128.2, 123.1 (q,  $J_{\text{CF}} = 272.9$  Hz), 121.6, 115.8, 43.8, 26.0; HRMS (ESI) calcd for  $\text{C}_{14}\text{H}_{13}\text{N}_4\text{F}_6\text{S}$ : 383.0765, found: 383.0772 ( $\text{M} + \text{H}$ ); Anal. Calc. for  $\text{C}_{14}\text{H}_{13}\text{N}_4\text{F}_6\text{S}$ : C, 43.98, H, 3.16, N, 14.65; found: C, 44.01, H, 3.20, N, 14.61.

Scheme S2

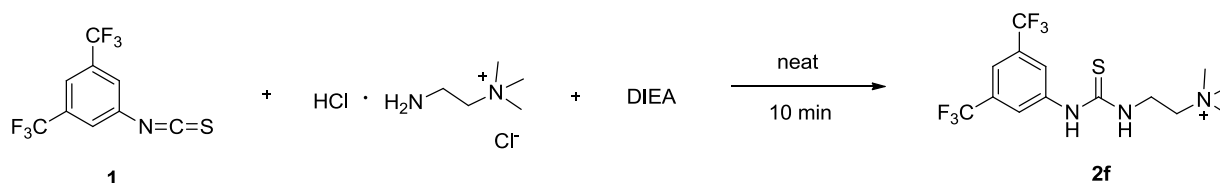

Catalyst **2f** was synthesized through a modified version of the general procedure above. In a 2-mL eppendorf tube, (2-aminoethyl)trimethylammonium chloride hydrochloride (50 mg, 0.286 mmol) was combined with N,N-diisopropylethylamine (0.050 mL, 0.286 mmol). Isothiocyanate **1** (0.052 mL, 0.286 mmol) was then added to the tube. The reaction mixture was vortexed for 10 min in the eppendorf tube. The reaction mixture was quenched by adding 2 mL of MeOH to the tube. The reaction mixture was concentrated and redissolved in distilled water. The resultant aqueous solution was filtered and diluted to prepare for purification. The product was purified by semi-prep HPLC with a gradient mobile phase [MeCN/ $\text{H}_2\text{O}$  (1:4) to MeCN/ $\text{H}_2\text{O}$  (1:1)]. Notably, a small percentage of trifluoroacetic acid was retained by the catalyst after purification and is present in the  $^{13}\text{C}$  NMR (page S12). Given the large excess of piperidine present in the catalyst screening, this trace acid did not significantly affect the rate of AHL aminolysis.

### 2-(3-(3,5-bis(trifluoromethyl)phenyl)thioureido)-N,N,N-trimethylethanaminium (2f)

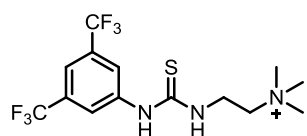

$\delta_{\text{H}}$  (DMSO- $d_6$ , 500 MHz) 10.78 (1H, br s), 8.80 (1H, s), 8.26 (2H, s), 7.80 (1H, s), 3.99 (2H, m), 3.54 (1H, t,  $J = 6.50$ ), 3.14 (9H, s);  $\delta_{\text{C}}$  ( $\text{CD}_3\text{CN}-d_3$ , 125 MHz) 182.9, 160.8 (q,  $J = 35.2$ ), 142.4, 131.5 (q,  $J_{\text{CF}} = 32.7$  Hz), 124.1 (q,  $J_{\text{CF}} = 271.6$  Hz), 123.5, 64.8, 54.1, 38.7; HRMS (ESI) calcd for  $\text{C}_{14}\text{H}_{18}\text{N}_3\text{F}_6\text{S}$ : 374.1126, found: 374.1120 ( $\text{M} + \text{H}$ ).

Catalysts **2g** and **2h** were synthesized following the general procedure displayed in Scheme S1 but reacting 2 eq (3.68 mmol) of **1** with 1 eq (1.84 mmol) of a diamine. Ethylenediamine was the diamine chosen to construct **2g** and 1,3-diaminopropane to make **2h**.

### 1,1'-(ethane-1,2-diyl)bis(3-(3,5-bis(trifluoromethyl)phenyl)thiourea) (2g)

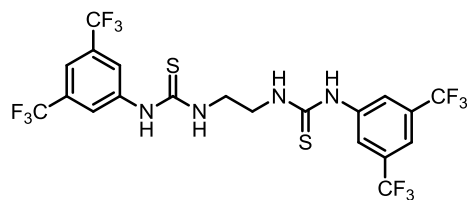

$\delta_{\text{H}}$  (DMSO- $d_6$ , 500 MHz) 10.14 (2H, s), 8.34 (2H, s), 8.22 (4H, s), 7.72 (2H, s), 3.77 (4H, br s);  $\delta_{\text{C}}$  (DMSO- $d_6$ , 125 MHz) 180.7, 141.4, 129.9 (q,  $J_{\text{CF}} = 32.7$  Hz), 122.9 (q,  $J_{\text{CF}} = 272.9$  Hz), 122.0, 116.0, 42.5; HRMS (ESI) calcd for  $\text{C}_{20}\text{H}_{15}\text{N}_4\text{F}_{12}\text{S}_2$ : 603.0547, found: 603.0546 (M + H); Anal. Calc. for  $\text{C}_{20}\text{H}_{15}\text{N}_4\text{F}_{12}\text{S}_2$ : C, 39.87; H, 2.34; N, 9.30; found: C, 40.15; H, 2.47; N, 9.06.

### 1,1'-(propane-1,3-diyl)bis(3-(3,5-bis(trifluoromethyl)phenyl)thiourea) (2h)

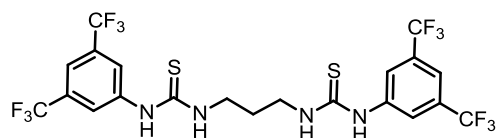

$\delta_{\text{H}}$  (DMSO- $d_6$ , 600 MHz) 10.09 (2H, s), 8.26 (2H, s), 8.22 (4H, s), 7.70 (2H, s), 3.57 (4H, s), 1.89 (2H, p,  $J = 6.6$  Hz);  $\delta_{\text{C}}$  (DMF- $d_7$ , 125 MHz) 181.6, 142.7, 131.1 (q,  $J_{\text{CF}} = 32.7$  Hz), 123.8 (q,  $J_{\text{CF}} = 271.5$  Hz), 122.6, 116.5, 42.1, 28.3; HRMS (ESI) calcd for  $\text{C}_{21}\text{H}_{17}\text{N}_4\text{F}_{12}\text{S}_2$ : 617.0703, found 617.0699 (M + H); Anal. Calc. for  $\text{C}_{21}\text{H}_{17}\text{N}_4\text{F}_{12}\text{S}_2$ : C, 40.91; H, 2.62; N, 9.09, found: C, 40.64; H, 2.58; N, 8.86.

### References:

1. T. Okino, Y. Hoashi, T. Furukawa, X. Xu and Y. Takemoto, *J. Am. Chem. Soc.*, 2005, **127**, 119-125.
2. B. Han, Q. Lin, R. Li, X. Tian, X. Xiong, J. Deng and Y. Chen, *Chem. Eur. J.* 2008, **14**, 8094–8097.

### General Procedure for *N*-Acyl Homoserine Lactone (AHL) Synthesis

The  $\text{C}_4$ ,  $\text{C}_6$ , and 3-oxo- $\text{C}_{12}$  AHLs are known compounds and were synthesized following previously published procedures.<sup>3-5</sup>

### *N*-Hexanoyl-L-homoserine Lactone (3)

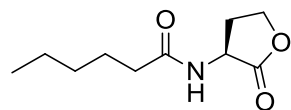

63.8% Yield;  $\delta_{\text{H}}$  (DMSO- $d_6$ , 500 MHz) 8.30 (1H, s), 4.49 (1H, m), 4.31 (1H, td,  $J_1 = 9.0$  Hz,  $J_2 = 1.5$  Hz), 4.17 (1H, m), 2.35 (1H, m), 2.13-2.06 (3H, m), 1.47 (2H, m,  $J = 7.5$  Hz), 1.26-1.21 (4H, m), 0.84 (3H, t,  $J = 7.0$  Hz);  $\delta_{\text{C}}$  (DMSO- $d_6$ , 125 MHz) 175.9, 172.7, 65.7, 48.3, 35.5, 31.2, 28.7, 25.2, 22.3, 14.3; MS (ESI) calcd for  $\text{C}_{10}\text{H}_{17}\text{NO}_3$ : 200.13, found: 200.12 (M + H).

### **N-Butyryl-L-homoserine Lactone (4)**

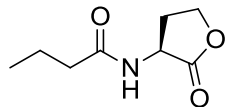

56.1% Yield;  $\delta_{\text{H}}$  (DMSO- $d_6$ , 500 MHz) 8.30 (1H, s), 4.51 (1H, m), 4.32 (1H, td,  $J_1 = 8.5$  Hz,  $J_2 = 2.0$  Hz), 4.18 (1H, m), 2.36 (1H, m), 2.14-2.05 (3H, m), 1.59 (2H, m,  $J = 7.5$  Hz), 0.84 (3H, t,  $J = 7.5$  Hz);  $\delta_{\text{C}}$  (DMSO- $d_6$ , 150 MHz) 175.3, 172.0, 65.1, 47.7, 36.9, 28.2, 18.5, 13.4; MS (ESI) calcd for  $\text{C}_8\text{H}_{13}\text{NO}_3$ : 172.10, found: 172.06 (M + H).

### **N-(3-Oxododecanolyl)-L-homoserine Lactone (5)**

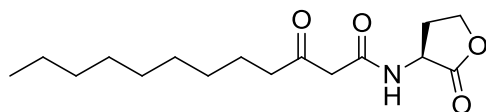

45.2% Yield;  $\delta_{\text{H}}$  ( $\text{CDCl}_3$ , 600 MHz) 7.75 (1H, d,  $J = 6.6$  Hz), 4.62 (1H, m), 4.48 (1H, td,  $J_1 = 9.0$  Hz,  $J_2 = 1.2$  Hz), 4.29 (1H, m), 3.48 (2H, s), 2.73 (1H, m), 2.54 (2H, t,  $J = 7.2$  Hz), 2.27 (1H, m), 1.58 (2H, p,  $J = 7.2$  Hz), 1.31-1.26 (12H, m), 0.88 (3H, t,  $J = 6.6$  Hz);  $\delta_{\text{C}}$  ( $\text{CDCl}_3$ , 150 MHz) 206.5, 175.0, 166.6, 65.9, 49.0, 48.3, 43.8, 31.8, 29.6, 29.4, 29.3, 29.2, 29.0, 23.4, 22.7, 14.1; MS (ESI) calcd for  $\text{C}_{16}\text{H}_{27}\text{NO}_4$ : 298.20, found: 298.18 (M + H).

### References:

3. S. R. Chhabra, B. Philipp, L. Eberl, M. Givskov, P. Williams and M. Cámara, *Topics in Current Chemistry*, 2005, **240**, 279–315.
4. S. R. Chhabra, C. Harty, D. S. W. Hooi, M. Daykin, P. Williams, G. Telford, D. J. Pritchard and B. W. Bycroft, *J. Med. Chem.*, 2002, **46**, 97-104.
5. A. M. Pomini and A. J. Marsaioli, *J. Nat. Prod.*, 2008, **71**, 1032-1036.

## NMR Kinetic Experiments

### AHL-Catalyst Interaction via $^1\text{H}$ NMR

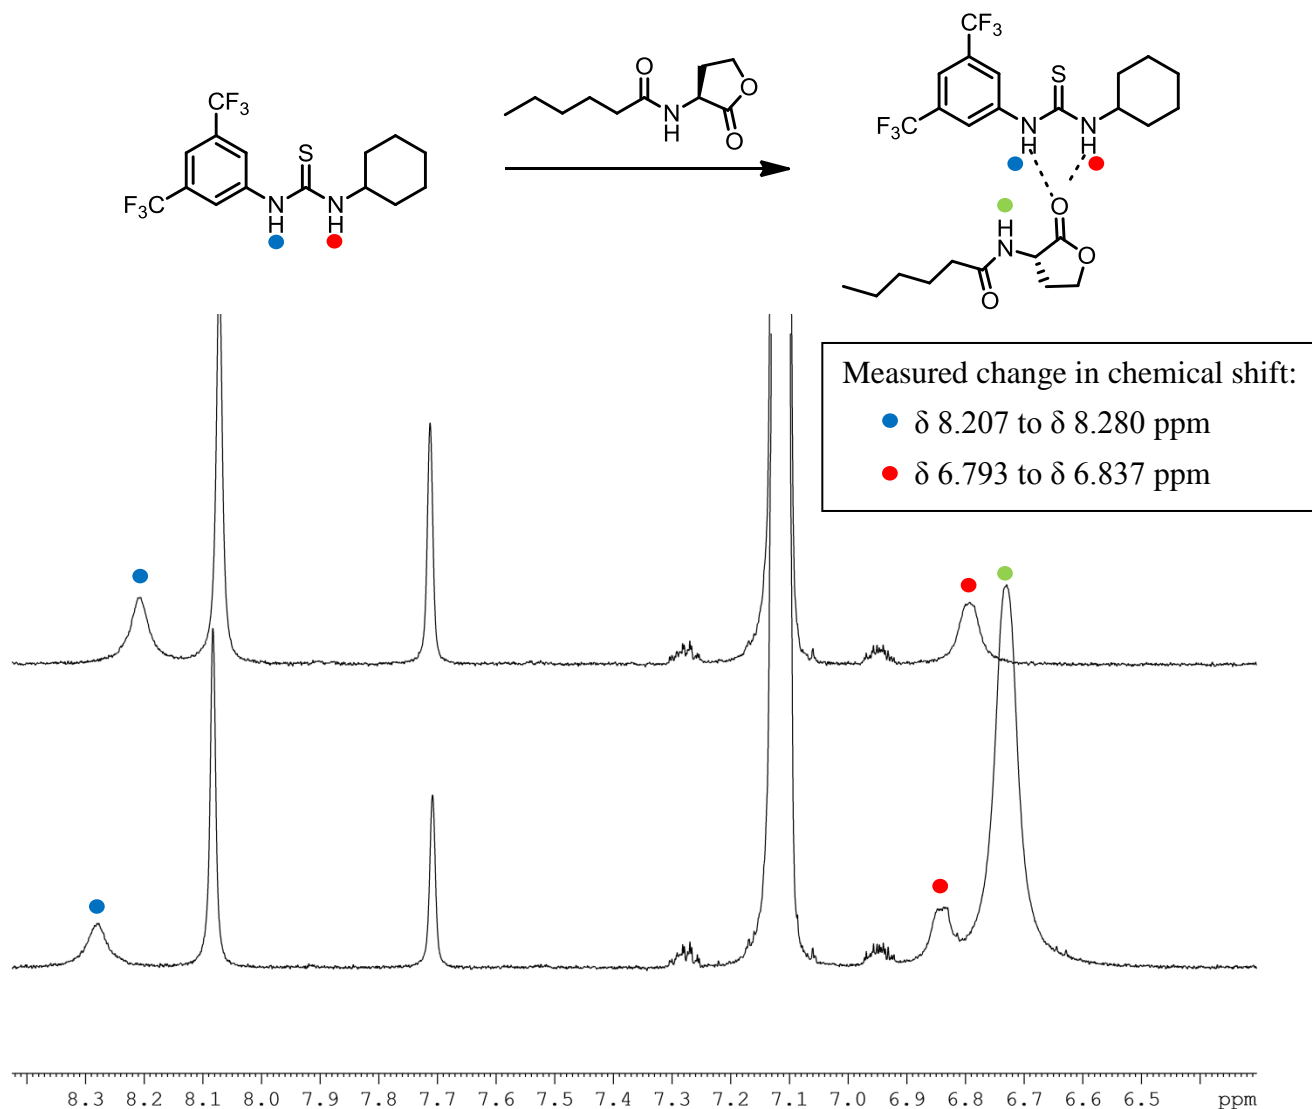

Figure S1 - Addition of C<sub>6</sub>-AHL to a solution of catalyst **2a** in CD<sub>3</sub>CN led to an observable downfield shift in N-H resonances of the thiourea.

### General Procedure for Catalyst Screening

#### Scheme S3

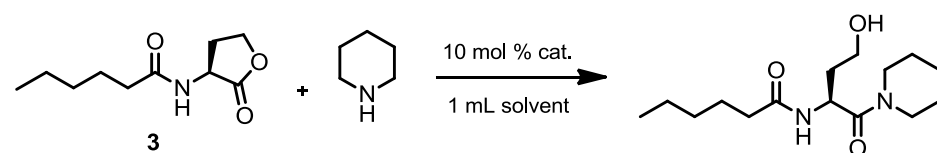

In a 4-mL scintillation vial, **3** (10.0 mg, 0.0502 mmol) and the thiourea catalyst being screened (0.00502 mmol) were combined. The catalyst and substrate were then dissolved in 1 mL of the deuterated solvent of choice. As an internal standard, 1,4-difluorobenzene (5.16  $\mu$ L, 0.00502 mmol) was added to the reaction mixture. Piperidine (99.0  $\mu$ L, 0.1004 mmol) was transferred into the vial and the reaction mixture was vortexed and quickly transferred to an NMR tube for analysis.  $^1\text{H}$  NMR experiments were acquired in a sequence with a spectra being acquired between every 376 – 669 s depending on the experiment. The integration of the  $\alpha$ -proton resonance of the lactone was monitored over time to track conversion from starting material to product (see Figure S1).

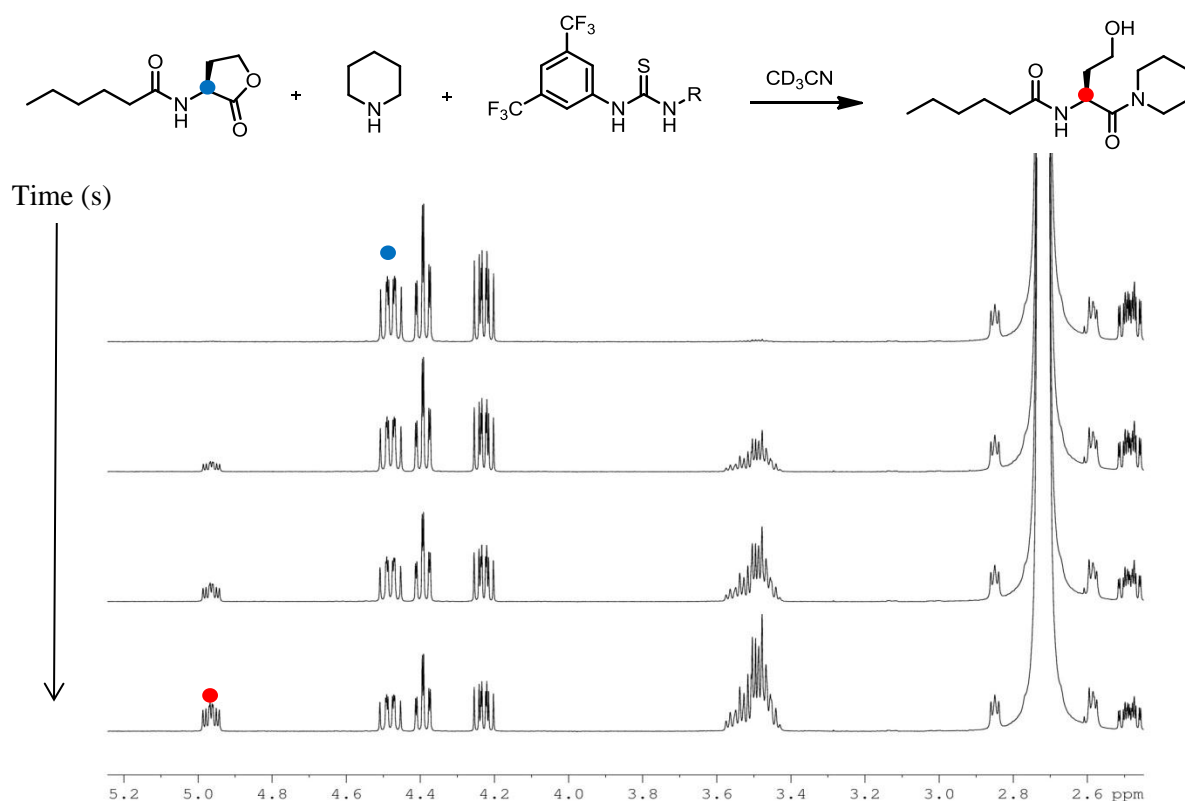

Figure S2 – Conversion of  $\text{C}_6$ -AHL to the corresponding aminolysis product

The integrations of the  $\text{C}_6$ -AHL and the corresponding aminolysis product resonances, appearing at 4.49 and 4.97 respectively, were tabulated and employed to determine percent conversion at the time that each spectra was acquired. The resultant percent conversions were then plotted vs. time (in seconds). A regression line was fit to the data points in the initial stages of reaction to determine the rate of the reaction. The regression line was solved where  $x = 50.0$  (or 50% conversion) to determine the half-life of the starting material ( $\text{C}_6$ -AHL). A sample calculation is shown below and the results are displayed in Tables 1 and 2 of the manuscript.

#### Sample $t_{50}$ Calculation



Table S1. C<sub>6</sub>-AHL  $\alpha$ -proton integrations changes during reaction with piperidine in CD<sub>3</sub>CN

| MB339_3  | t <sub>50</sub> = 37600 s |             |          |
|----------|---------------------------|-------------|----------|
| Time (s) | Int 4.49ppm               | Int 4.97ppm | % Conv   |
| 600      | 0.9541                    | 0           | 0        |
| 729      | 0.930341                  | 0.001694    | 0.181782 |
| 1398     | 0.916784                  | 0.012678    | 1.364025 |
| 2067     | 0.909431                  | 0.022505    | 2.414907 |
| 2736     | 0.90006                   | 0.036206    | 3.867022 |
| 4074     | 0.880634                  | 0.055968    | 5.975674 |
| 5412     | 0.861099                  | 0.07793     | 8.299018 |
| 6750     | 0.842755                  | 0.098016    | 10.41866 |
| 8088     | 0.826012                  | 0.11798     | 12.49799 |
| 9426     | 0.804961                  | 0.136436    | 14.49293 |
| 10764    | 0.78807                   | 0.15608     | 16.53127 |
| 12102    | 0.765377                  | 0.171036    | 18.26502 |
| 13440    | 0.749704                  | 0.191816    | 20.37301 |
| 14778    | 0.730972                  | 0.209067    | 22.24025 |
| 16116    | 0.712837                  | 0.225932    | 24.06684 |
| 17454    | 0.697733                  | 0.245455    | 26.02397 |
| 18792    | 0.6863                    | 0.262463    | 27.66371 |
| 20130    | 0.669336                  | 0.279969    | 29.492   |
| 21468    | 0.659008                  | 0.297069    | 31.07166 |
| 22806    | 0.632959                  | 0.304898    | 32.51007 |
| 24144    | 0.621924                  | 0.323663    | 34.22879 |
| 25482    | 0.609451                  | 0.341129    | 35.88641 |
| 26820    | 0.598153                  | 0.355315    | 37.26554 |
| 28158    | 0.578194                  | 0.367974    | 38.89098 |
| 29496    | 0.571494                  | 0.385202    | 40.26378 |
| 30834    | 0.551948                  | 0.397418    | 41.86141 |
| 32172    | 0.543054                  | 0.410723    | 43.06279 |
| 33510    | 0.527491                  | 0.425157    | 44.62897 |

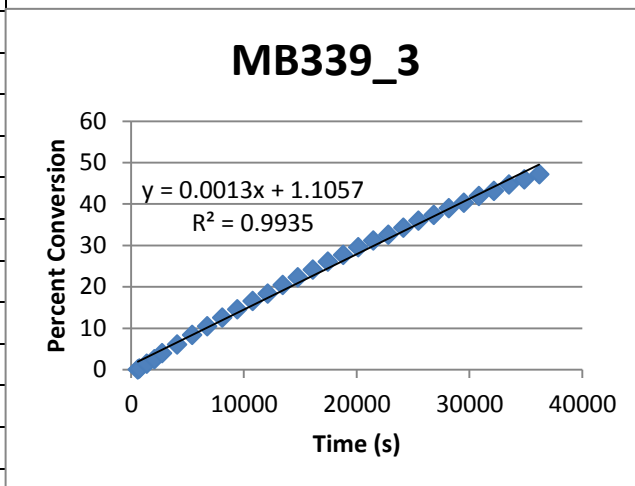

$$y = 0.0013x + 1.1057 \quad (1)$$

$$50.0 = 0.0013x + 1.1057 \quad (2)$$

$$x = 37600 \text{ s} = t_{1/2} \quad (3)$$

### Product Characterization

**(S)-N-(4-hydroxy-1-oxo-1-(piperidin-1-yl)butan-2-yl)hexanamide**

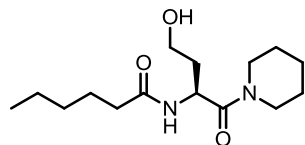

$\delta_{\text{H}}$  ( $\text{CD}_3\text{CN-d}_3$ , 500 MHz) 6.86 (1H, s), 4.92 (1H, m), 3.58 (1H, dd,  $J_1 = 2.5$  Hz,  $J_2 = 5.0$  Hz), 3.53-3.41 (6H, m), 2.21-2.17 (3H, m), 1.81 (1H, m), 1.62 (2H, m), 1.56 (4H, m), 1.50-1.45 (3H, m), 1.32-1.26 (4H, m), 0.88 (3H, t,  $J = 7.0$  Hz);  $\delta_{\text{C}}$  ( $\text{CD}_3\text{CN-d}_3$ , 125 MHz) 173.8, 170.0, 57.8, 46.4, 46.2, 43.0, 36.2, 36.0, 31.5, 26.4, 25.7, 25.6, 24.5, 22.5, 13.6; MS (ESI) calcd for  $\text{C}_{15}\text{H}_{28}\text{N}_2\text{O}_3$ : 285.22, found: 285.20 ( $\text{M} + \text{H}$ ); Anal. Calc. for  $\text{C}_{15}\text{H}_{28}\text{N}_2\text{O}_3$ : C, 63.35; H, 9.92; N, 9.85; found: C, 63.34; H, 9.76; N, 9.80.

Spectral Data –  $^1\text{H}$  &  $^{13}\text{C}$  NMR Spectra\*

$^1\text{H}$  NMR of catalyst **2b** in DMSO- $\text{d}_6$  ( $\delta$  2.49 ppm)

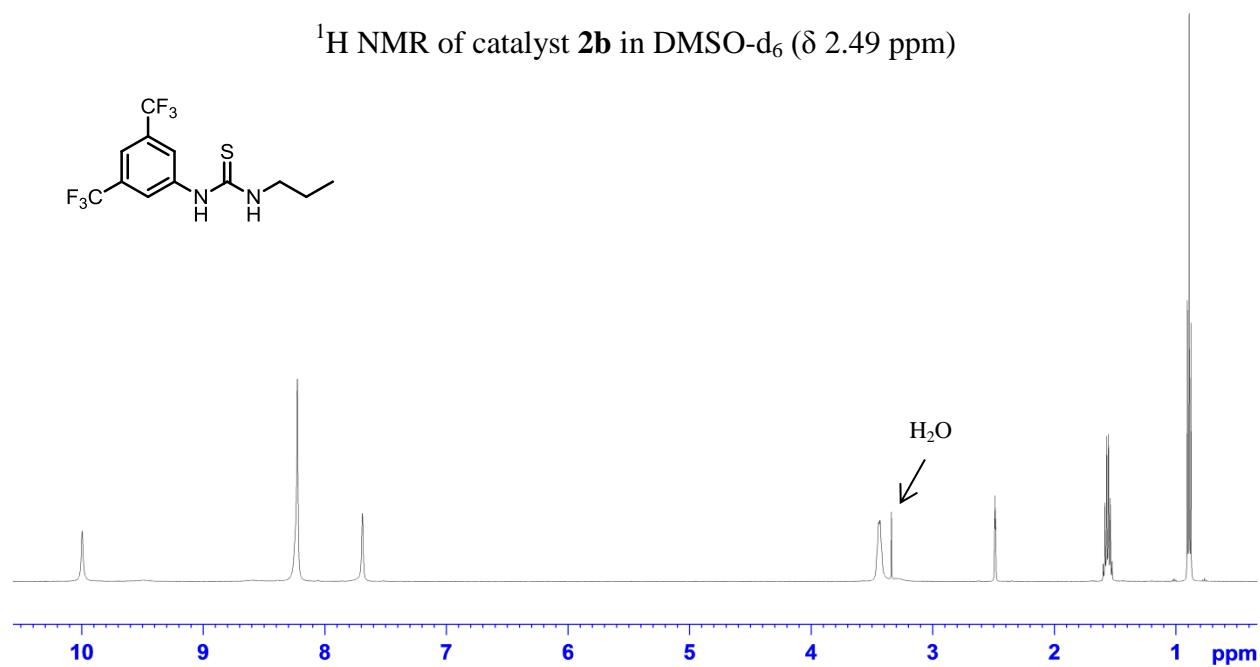

$^{13}\text{C}$  NMR of catalyst **2b** in DMSO- $\text{d}_6$  ( $\delta$  39.5 ppm)

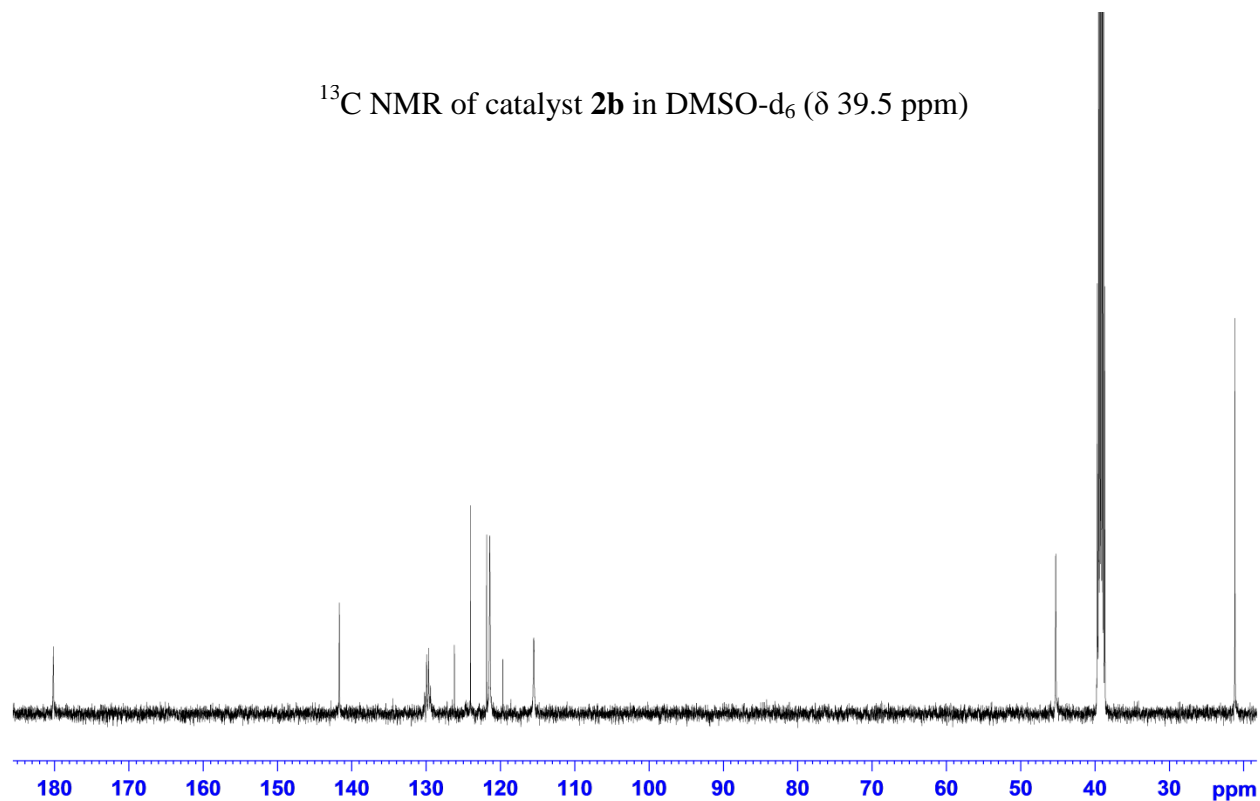

\*spectral data for previously characterized compounds is not displayed

$^1\text{H}$  NMR of catalyst **2e** in DMSO- $\text{d}_6$

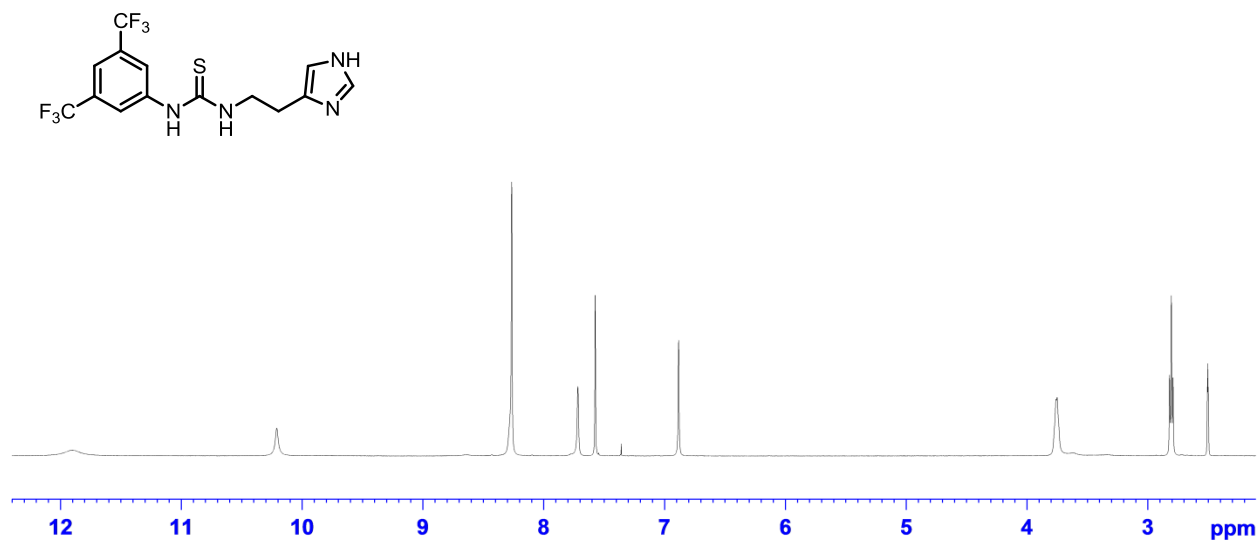

$^{13}\text{C}$  NMR of catalyst **2e** in DMSO- $\text{d}_6$

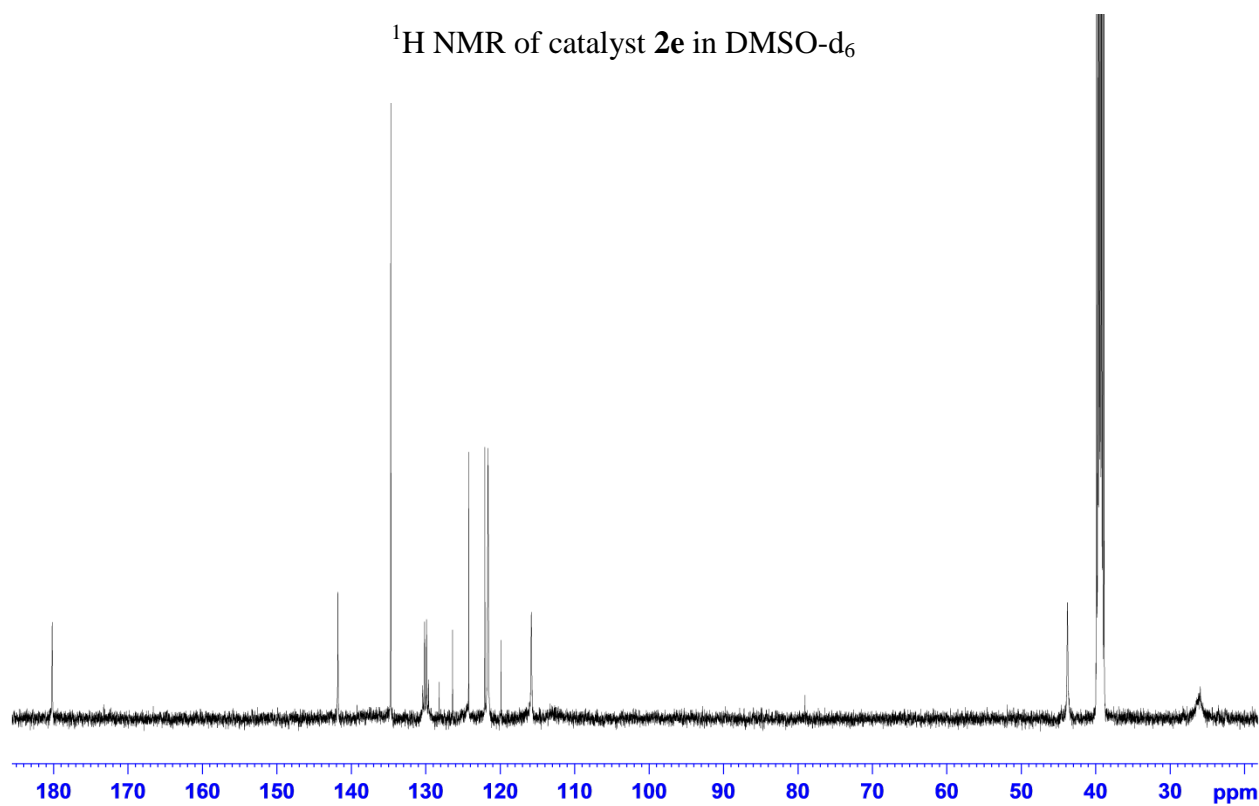

$^1\text{H}$  NMR of catalyst **2f** in  $\text{DMSO-d}_6$

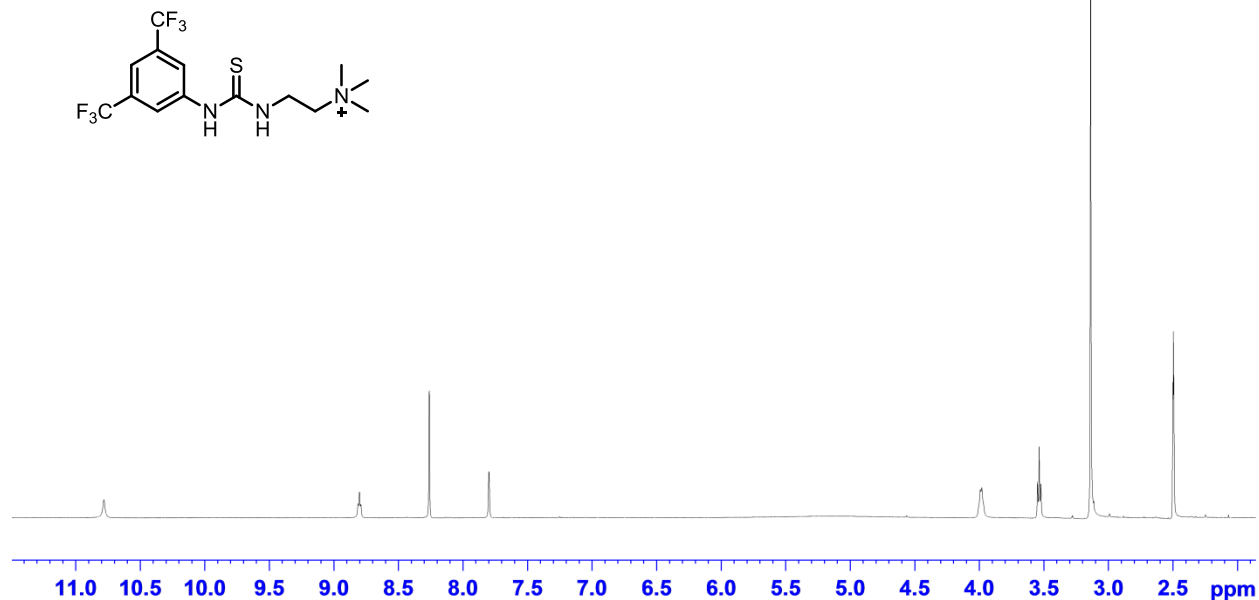

$^{13}\text{C}$  NMR of catalyst **2f** in  $\text{CD}_3\text{CN}$

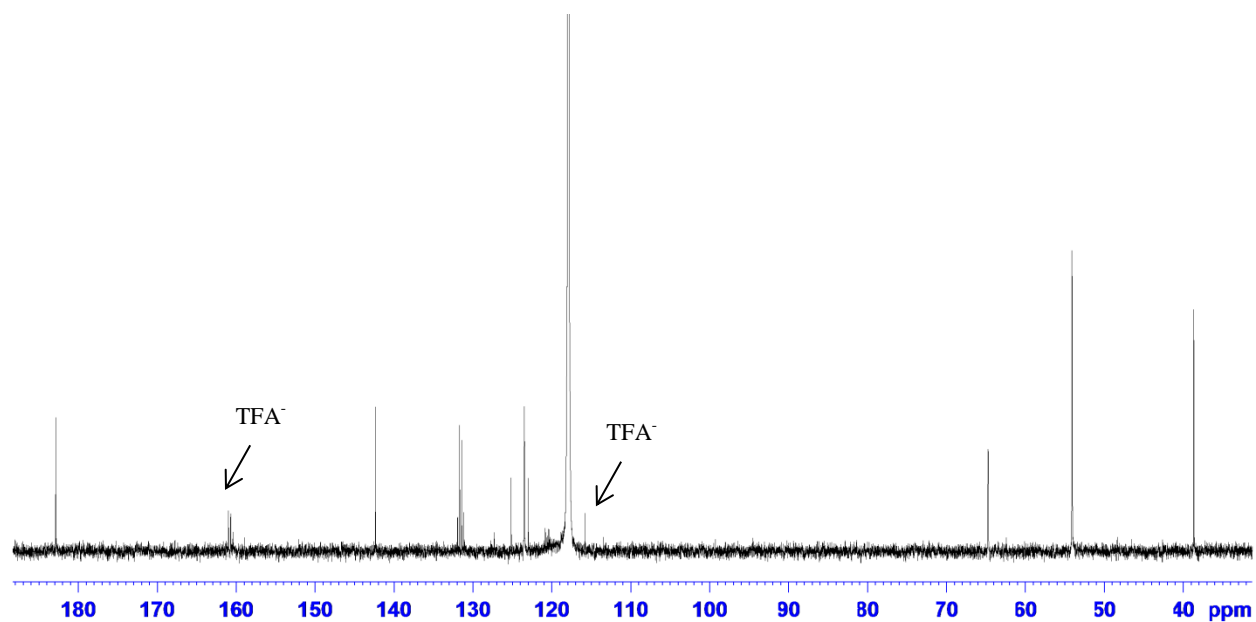

The presence of trifluoroacetic acid (TFA) in the carbon spectrum is due to the acidic mobile phase of the HPLC on which the thiourea was purified. Due to the large excess of piperidine in the catalytic screenings, the acid should have had no effect on the relative rates obtained.

$^1\text{H}$  NMR of catalyst **2h** in  $\text{DMSO-d}_6$

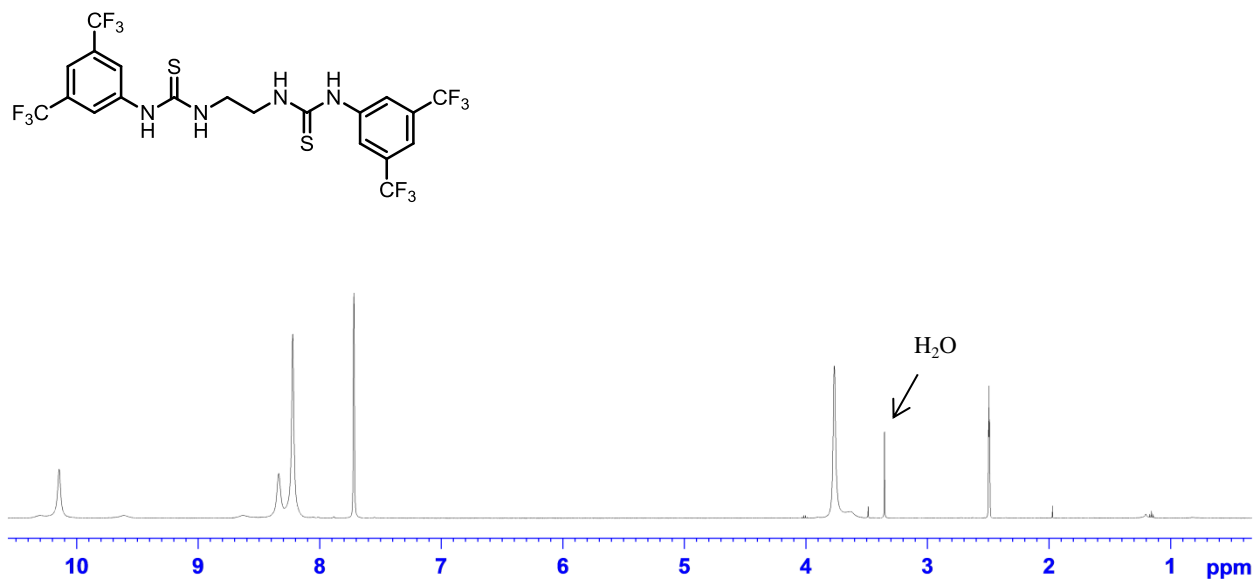

$^{13}\text{C}$  NMR of catalyst **2h** in  $\text{DMSO-d}_6$

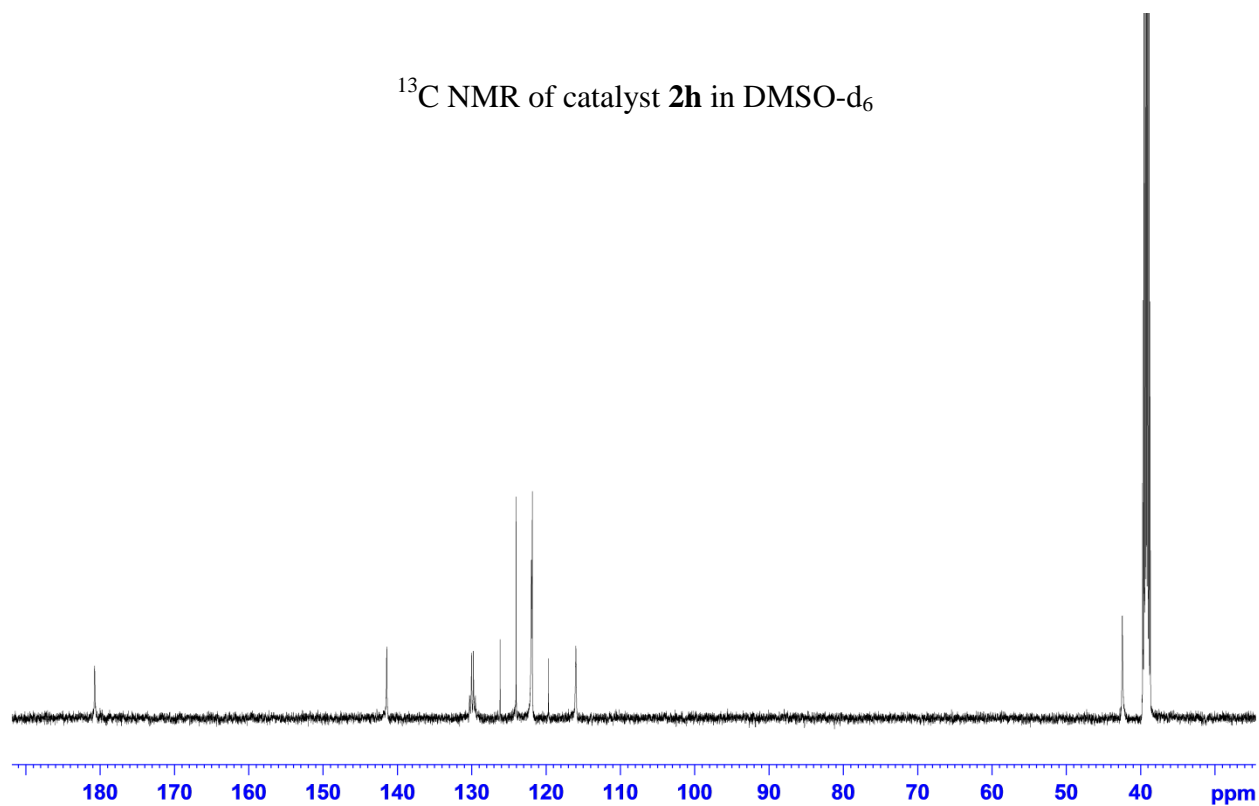

$^1\text{H}$  NMR of catalyst **2i** in  $\text{DMSO-d}_6$

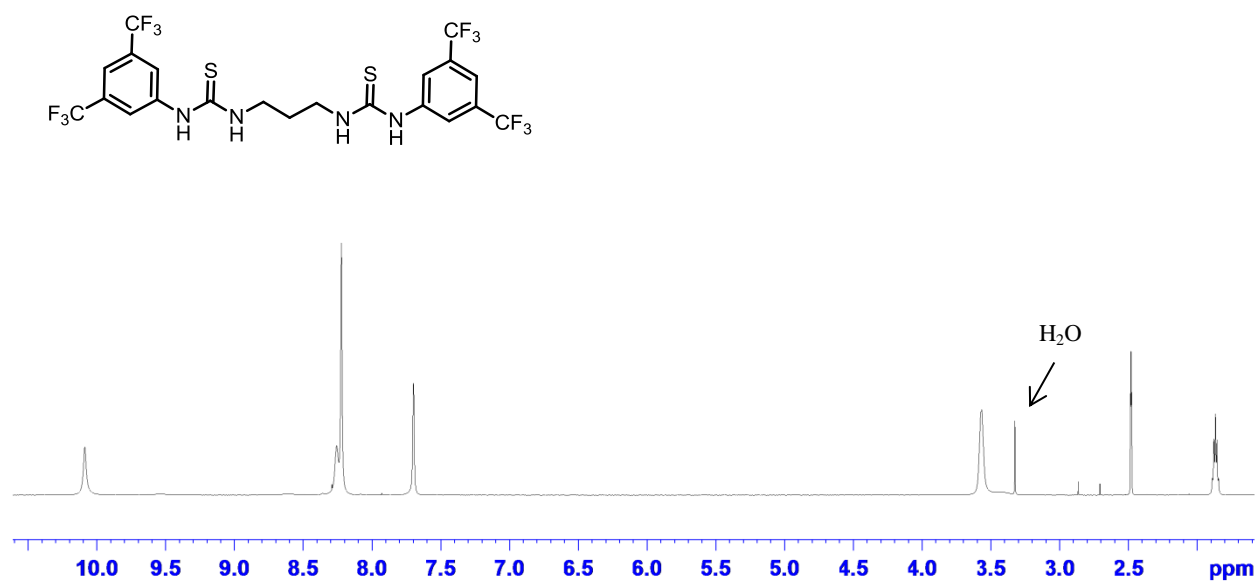

$^{13}\text{C}$  NMR of catalyst **2i** in  $\text{DMF-d}_7$  ( $\delta$ 162.7, 35.2, 30.1 ppm)

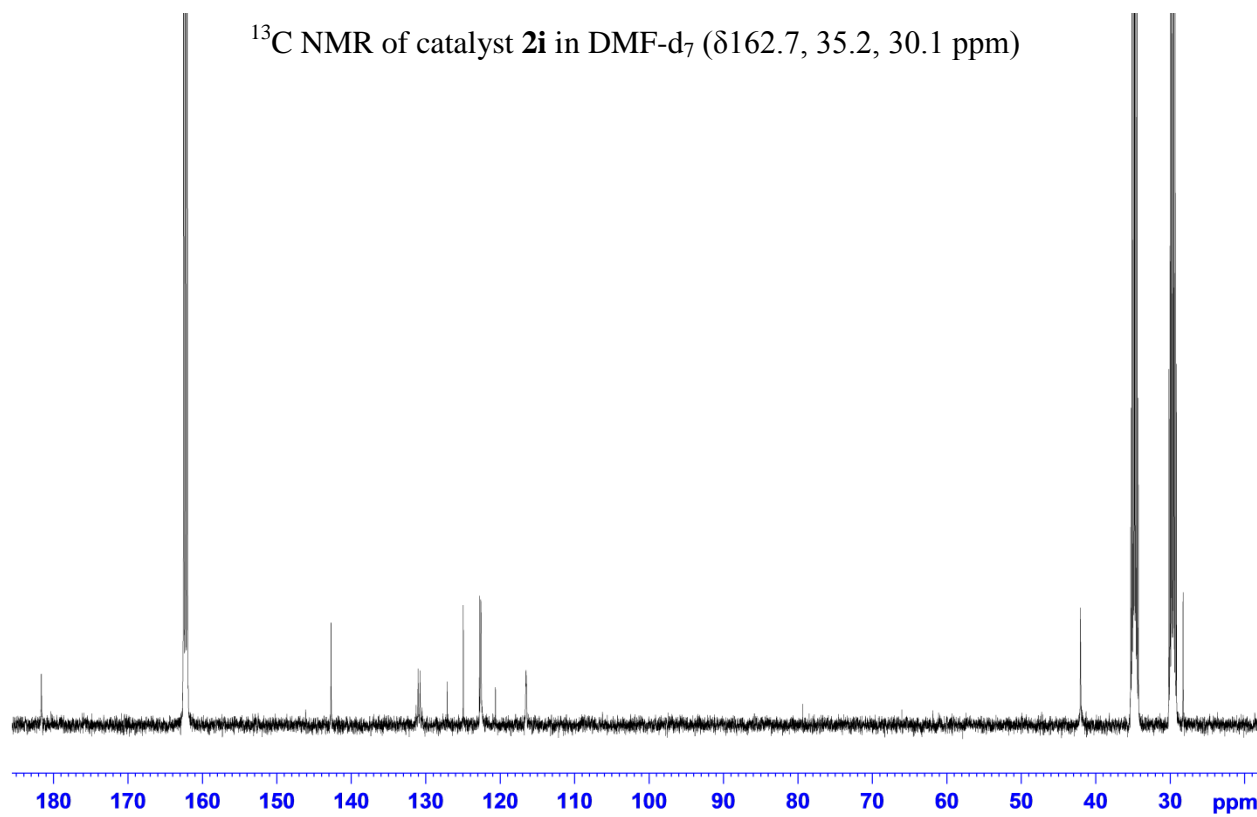

Supplement: c3cc00268c.pdf [file c3cc00268c.pdf]
